# Supplementary material for: Balneotherapy for Musculoskeletal Pain Management of Hot Spring Water in Southern Ethiopia: Perceived Improvements
Source: PubMed Central journal article supplement — Inquiry. 2021 Oct 15;58:00469580211049063. doi: 10.1177/00469580211049063 (PMC8524688; doi:10.1177/00469580211049063), 2021-10-15
Supplement: sj-pdf-1-inq-10.1177_00469580211049063.pdf [file sj-pdf-1-inq-10.1177_00469580211049063.pdf]

Table A: Criteria to diagnosis rheumatoid arthritis clinically

| <b>Rheumatoid arthritis table</b>                                             |                                                                                                                                                   |          |                                                  |
|-------------------------------------------------------------------------------|---------------------------------------------------------------------------------------------------------------------------------------------------|----------|--------------------------------------------------|
| Duration of symptoms                                                          |                                                                                                                                                   |          | <b>Remark</b>                                    |
|                                                                               | < six weeks                                                                                                                                       | 0 point  |                                                  |
|                                                                               | ≥ six weeks                                                                                                                                       | 1 point  |                                                  |
| Joint involvement                                                             |                                                                                                                                                   |          |                                                  |
|                                                                               | One large joint /<br>shoulders, elbows, hips, knees, ankles/                                                                                      | 0 point  |                                                  |
|                                                                               | Two to 10 large joints<br><b>(draw blood and send for laboratory)</b>                                                                             | 1 point  | Order lab. Tests if the score result two or more |
|                                                                               | One to three small joints (with or without involvement of large joints)/MCP,PIP,second to fifth MTP, thumb interphalangeal /IP/ and wrist joints/ | 2 points |                                                  |
|                                                                               | Four to 10 small joints (with or without involvement of large joints)                                                                             | 3 points |                                                  |
|                                                                               | > 10 joints (at least one small joint)                                                                                                            | 5 points |                                                  |
| <b>Serology (at least one test result is needed for classification)</b>       |                                                                                                                                                   |          |                                                  |
|                                                                               | Negative RF <i>and</i> negative ACPA                                                                                                              | 0 point  |                                                  |
|                                                                               | Low positive RF <i>or</i> low positive ACPA                                                                                                       | 2 points |                                                  |
|                                                                               | High positive RF <i>or</i> high positive ACPA                                                                                                     | 3 points |                                                  |
| Acute phase reactants (at least one test result is needed for classification) |                                                                                                                                                   |          |                                                  |
|                                                                               | .Normal CRP and normal ESR                                                                                                                        | 0 point  |                                                  |
|                                                                               | Abnormal CRP or normal ESR                                                                                                                        | 1 point  |                                                  |
